# Supplementary material for: Electrochemical reduction of N2 to ammonia on Co single atom embedded N-doped porous carbon under ambient conditions
Source: Royal Society of Chemistry journal article supplement (doi:10.1039/c9ta10382a), 2019-01-01
Supplement: c9ta10382a1.pdf [file c9ta10382a1.pdf]

## Supplementary Information

### Electrochemical reduction of N<sub>2</sub> to ammonia on Co single atoms embedded N-doped porous carbon under ambient conditions

Yanming Liu,<sup>a</sup> Qi Xu,<sup>a</sup> Xinfei Fan,<sup>b</sup> Xie Quan,<sup>\*a</sup> Yan Su,<sup>c</sup> Shuo Chen,<sup>a</sup> Hongtao Yu,<sup>a</sup> Zhengjun Cai <sup>a</sup>

<sup>a</sup>Key Laboratory of Industrial Ecology and Environmental Engineering (Ministry of Education), School of Environmental Science and Technology, Dalian University of Technology, Dalian 116024, China.

<sup>b</sup>College of Environmental Science and Engineering, Dalian Maritime University, Dalian 116026, China.

<sup>c</sup>School of Physics and Opto-Electronic Technology, Dalian University of Technology, Dalian 116024, China.

Corresponding author E-mail: quanxie@dlut.edu.cn

#### **This file includes:**

Fig. S1. SEM of ZIF and TEM images of CSA/NPCs.

Fig. S2. Structure characterization of CSA/NPCs.

Fig. S3. Cyclic voltammograms and chronoamperometric curves.

Fig. S4. Hydrazine detection.

Fig. S5. <sup>1</sup>H-NMR spectra for <sup>14</sup>NH<sub>4</sub><sup>+</sup> and <sup>15</sup>NH<sub>4</sub><sup>+</sup> detection.

Fig. S6. NH<sub>3</sub> production rates of CSA/NPC-700.

Fig. S7. H<sub>2</sub> efficiency of CSA/NPC-750.

Fig. S8. SEM images before and after N<sub>2</sub> reduction.

Fig. S9. XPS spectra before and after N<sub>2</sub> reduction.

Fig. S10. Potentiostatic stability of CSA/NPC-750.

Fig. S11. SEM and TEM images for NPC-750 and Co/NPC-750.

Fig. S12. XPS spectra of CSA/NPCs.

Fig. S13. N<sub>2</sub> adsorption comparison.

Fig. S14. Free energy for ammonia synthesis.

Table S1. The EXAFS fitting results of CSA/NPC-750.

Table S2. Comparison of NH<sub>3</sub> synthesis performance between CSA/NPC-750 and electrocatalysts reported.

Table S3. The N/C and Co/C ratios for CSA/NPC-750 before and after N<sub>2</sub> reduction.

Table S4. The metal and N contents of CSA/NPCs, NPC-750 and Co/NPC-750.

## 1. Supplementary Figures

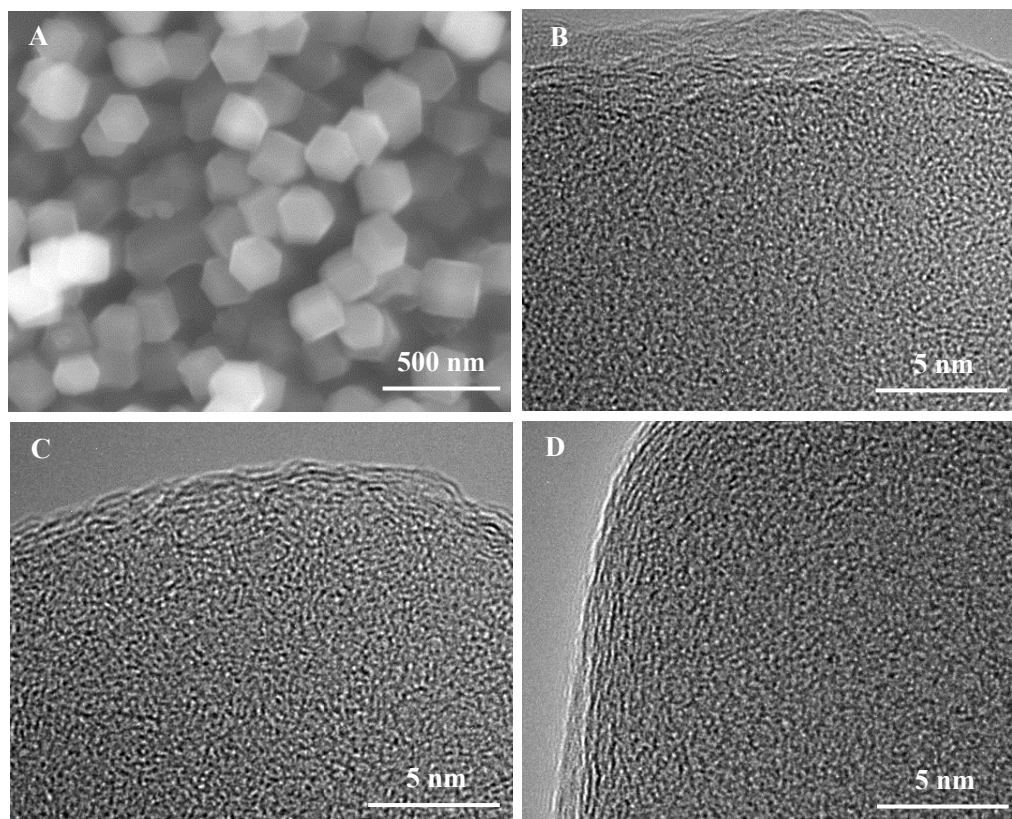

**Fig. S1** (A) SEM image of Zn/Co bimetallic ZIF precursor, TEM images of (B) CSA/NPC-750, (C) CSA/NPC-850 and (D) CSA/NPC-950.

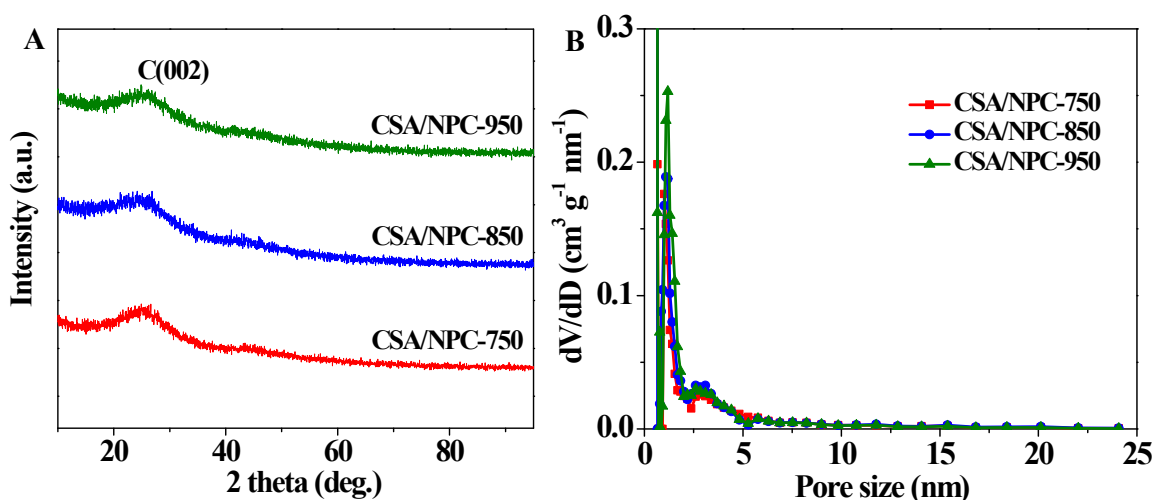

**Fig. S2** (A) X-ray diffraction spectra and (B) pore size distribution of CSA/NPC-750, CSA/NPC-850 and CSA/NPC-950 (DFT method).

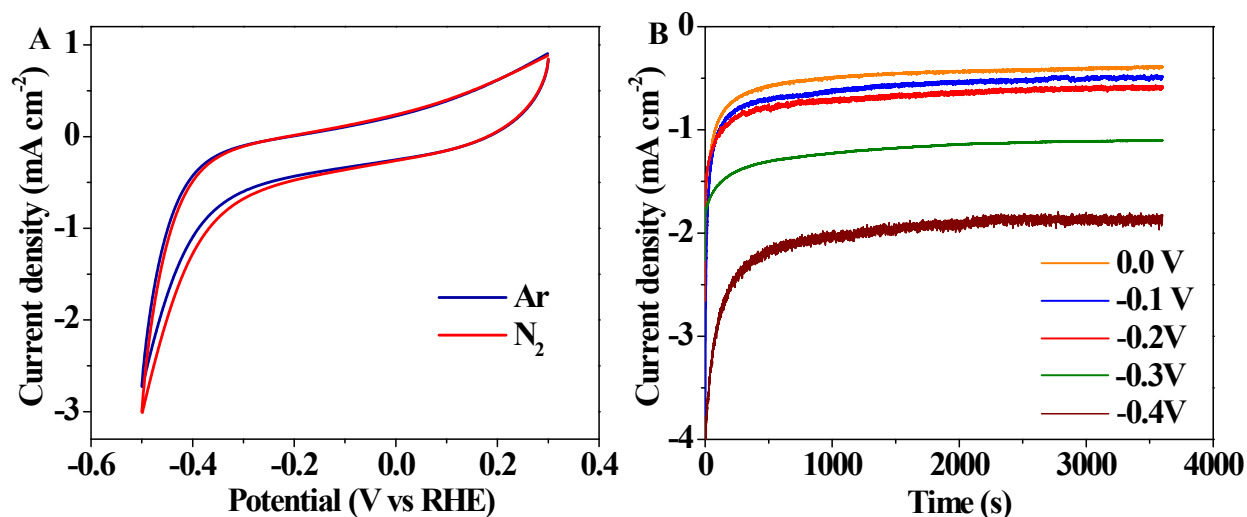

**Fig. S3** (A) Cyclic voltammograms of CSA/NPC-750 on glassy carbon in  $\text{N}_2$  or Ar saturated 0.05 M  $\text{Na}_2\text{SO}_4$  with scan rate of  $20 \text{ mV s}^{-1}$ , (B) Chronoamperometric curves for electrochemical reduction of  $\text{N}_2$  on CSA/NPC-750 at 0.0~-0.4 V (vs RHE).

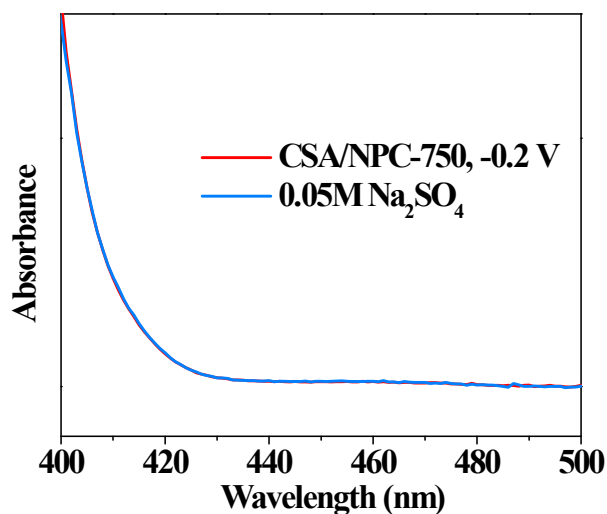

**Fig. S4.** UV-Vis curves of 0.05 M  $\text{Na}_2\text{SO}_4$  and the sample for  $\text{N}_2$  reduction on CSA/NPC-750 (1 h, -0.2 V, 0.05 M  $\text{Na}_2\text{SO}_4$ ) measured by p-dimethylaminobenzaldehyde method.

To find out whether hydrazine can be produced, electrochemical reduction of  $\text{N}_2$  was conducted on CSA/NPC-750 at -0.2 V in 0.05 M  $\text{Na}_2\text{SO}_4$  for 1 h and hydrazine concentration of the solution was measured by p-dimethylaminobenzaldehyde spectrophotometric method. Details as follows: 2.0 g p-dimethylaminobenzaldehyde, 100 mL ethanol and 10 mL HCl (12.0 mol/L) were mixed and used as color reagent. 0.8 mL color reagent was added into a mixture of 2.0 mL solution (taken from electrochemical cell

after N<sub>2</sub> reduction for 1 h) and 2.0 mL HCl (0.24 mol/L). After mixing thoroughly, the resulting solution sat for 20 min. Its absorbance was measured at 458 nm. The absorbance of 0.05 M Na<sub>2</sub>SO<sub>4</sub> was used as reference. As shown in Fig. S4, the absorbance of the sample obtained from N<sub>2</sub> reduction on CSA/NPC-750 at -0.2 V is 0.0211, which is similar to that of 0.05 M Na<sub>2</sub>SO<sub>4</sub> (0.0209). Therefore, hydrazine is not produced during N<sub>2</sub> reduction on CSA/NPC-750.

To confirm ammonia is produced from N<sub>2</sub> reduction, <sup>15</sup>N<sub>2</sub> reduction has been performed on CSA/NPC-750 at 0.05 M Na<sub>2</sub>SO<sub>4</sub>. Details as follows: Ar purge was undertaken for 30 min to remove <sup>14</sup>N<sub>2</sub> in the cell and electrolyte, followed by <sup>15</sup>N<sub>2</sub> purge for 20 min. Electrochemical reduction of <sup>15</sup>N<sub>2</sub> was conducted on CSA/NPC-750 at -0.2 V with <sup>15</sup>N<sub>2</sub> flow. After <sup>15</sup>N<sub>2</sub> reduction for 1 h, the sample was collected and adjusted to pH 2 with HCl for ammonia quantification by <sup>1</sup>H-NMR on Bruker 700 MHz spectrometer with DMSO as internal standards. The sample was mixed with 0.2 mM DMSO (D<sub>2</sub>O was used as solvent) with ratio of 9:1. <sup>1</sup>H-NMR measurement was performed for 2500 scans with water suppression. As reference, electrolysis was also conducted under Ar on CSA/NPC-750 (-0.2 V, 1 h) and the solution was collected for <sup>1</sup>H-NMR measurement with the same method mentioned above. As reference, the <sup>1</sup>H-NMR spectrum of 0.5 mM <sup>14</sup>NH<sub>4</sub>Cl (pH 2) was measured by the same method with 250 scans. Calibration curve for <sup>15</sup>NH<sub>4</sub><sup>+</sup> was tested using <sup>15</sup>NH<sub>4</sub>Cl with concentrations of 0-300 μM. As shown in Fig. S5A, doublet at 6.93 ppm and 7.08 ppm can be observed on the <sup>1</sup>H-NMR spectrum for <sup>15</sup>N<sub>2</sub> reduction sample, while triplet around 6.91-7.09 ppm appear on the <sup>1</sup>H-NMR spectrum for <sup>14</sup>NH<sub>4</sub><sup>+</sup> standard sample and no discernable peak can be observed for electrolysis under Ar. The doublet (6.93 ppm and 7.08 ppm) for <sup>15</sup>N<sub>2</sub> reduction sample can be attributed to the signal of <sup>15</sup>NH<sub>4</sub><sup>+</sup>,<sup>1</sup> and the triplet (6.91-7.09 ppm) arises from <sup>14</sup>NH<sub>4</sub><sup>+</sup>. The <sup>15</sup>N labelling and Ar electrolysis experiments indicate the detected ammonia in this work is produced from N<sub>2</sub> reduction. To confirm it, the <sup>15</sup>NH<sub>4</sub><sup>+</sup> produced from <sup>15</sup>N<sub>2</sub> reduction is quantified with the calibration curve in Fig. S5B, which shows the peak area ratio of <sup>15</sup>NH<sub>4</sub><sup>+</sup>/DMSO versus <sup>15</sup>NH<sub>4</sub><sup>+</sup> concentration. The obtained <sup>15</sup>NH<sub>4</sub><sup>+</sup> production rate is 0.82 μmol cm<sup>-2</sup> h<sup>-1</sup>, consistent with result of 0.86 μmol cm<sup>-2</sup> h<sup>-1</sup> from <sup>14</sup>N<sub>2</sub> reduction. These results confirm the ammonia detected in this work is produced from N<sub>2</sub> reduction.

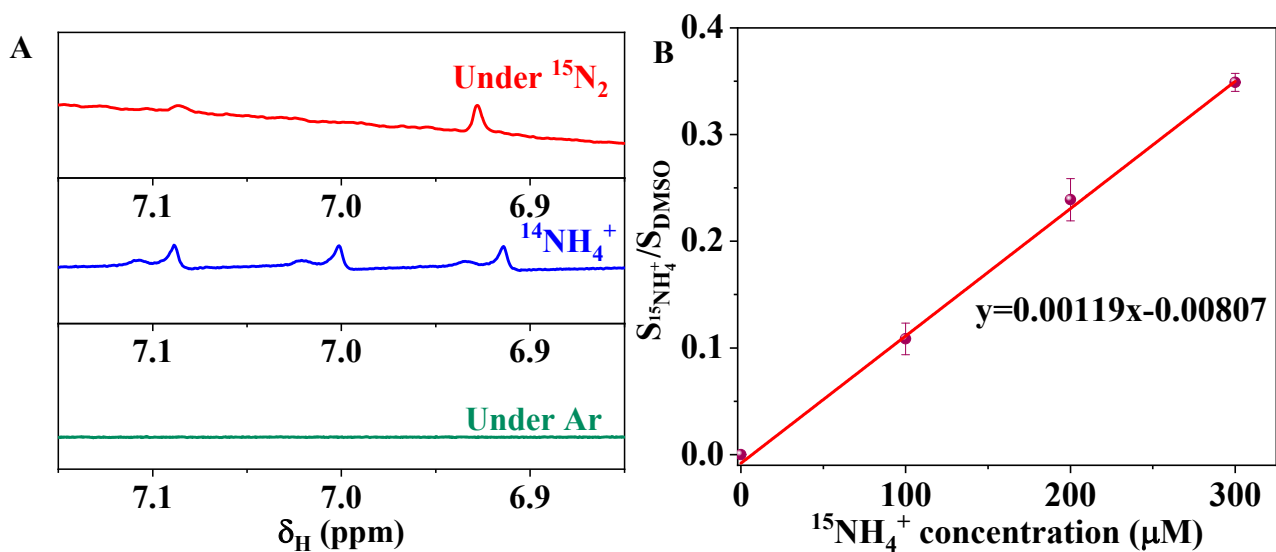

**Fig. S5**  $^1\text{H-NMR}$  spectra for (A) 0.5 mM  $\text{NH}_4^+$  standard (250 scans),  $^{15}\text{N}_2$  reduction and Ar electrolysis on CSA/NPC-750 at -0.2 V (2500 scans), (B) calibration curve for  $^{15}\text{NH}_4^+$ : the peak area ratio of  $^{15}\text{NH}_4^+/\text{DMSO}$  versus  $^{15}\text{NH}_4^+$  concentration.

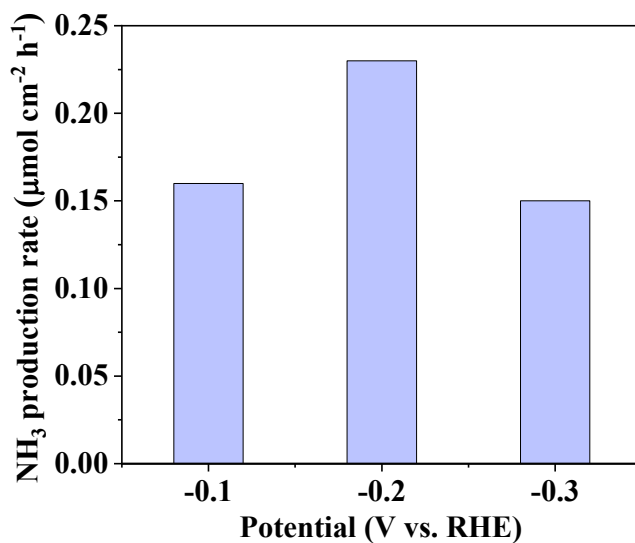

**Fig. S6** The  $\text{NH}_3$  production rates of CSA/NPC-700 for electrochemical reduction of  $\text{N}_2$  at -0.1~-0.3 V (vs RHE) and 0.05 M  $\text{Na}_2\text{SO}_4$ .

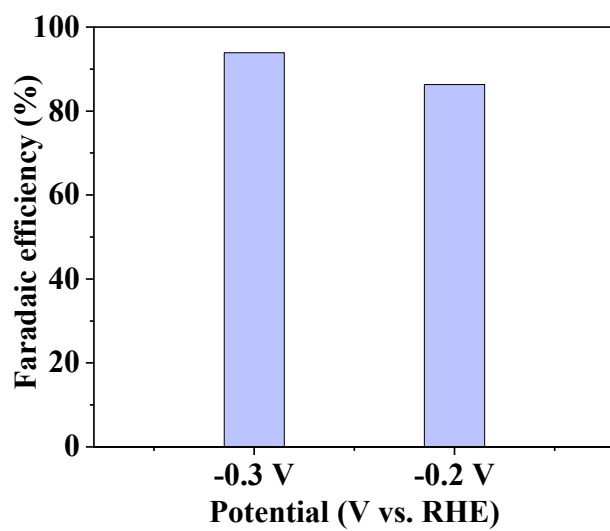

**Fig. S7** The H<sub>2</sub> production efficiencies during electrochemical reduction of N<sub>2</sub> on CSA/NPC-750 at -0.2 V and -0.3 V.

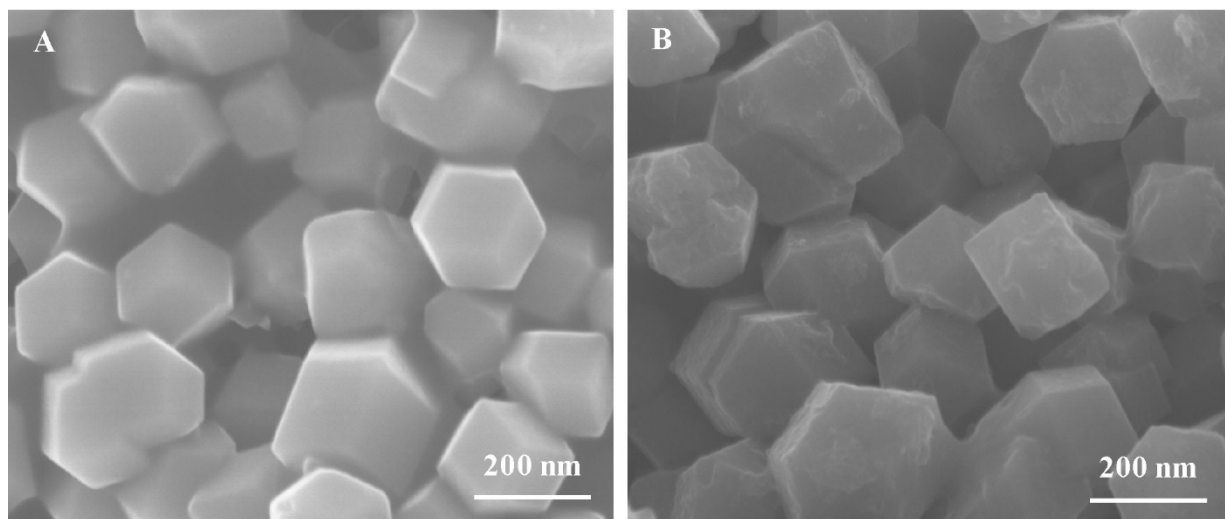

**Fig. S8** SEM images of CSA/NPC-750 electrode (A) before and (B) after electrochemical reduction of N<sub>2</sub> at -0.2 V.

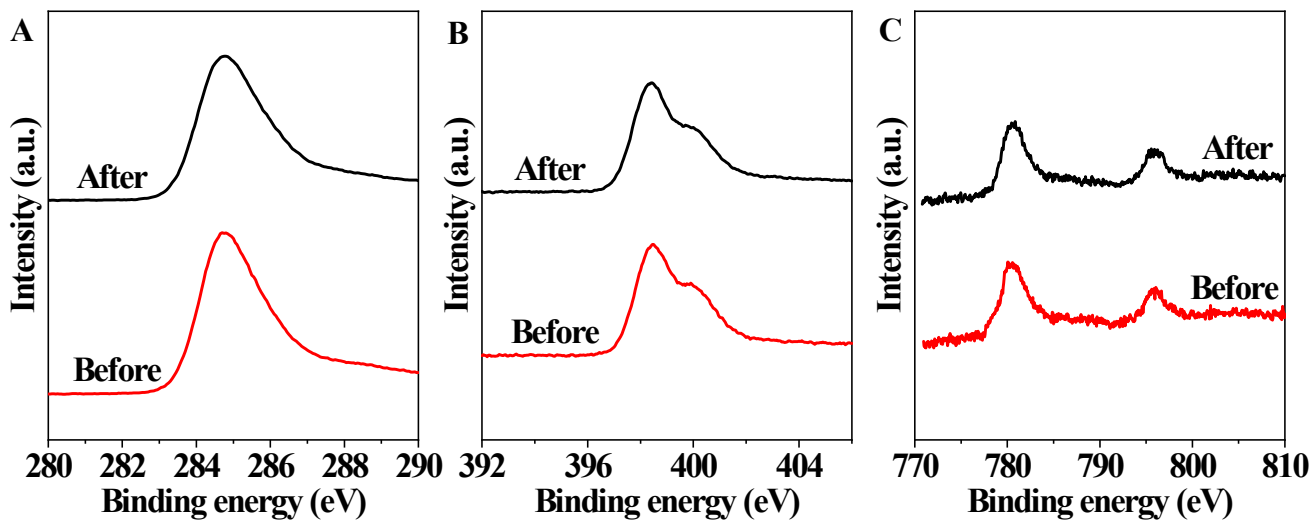

**Fig. S9** (A) C 1s, (B) N 1s and (C) Co 2p XPS spectra of CSA/NPC-750 before and after electrochemical reduction of  $N_2$  at -0.2 V.

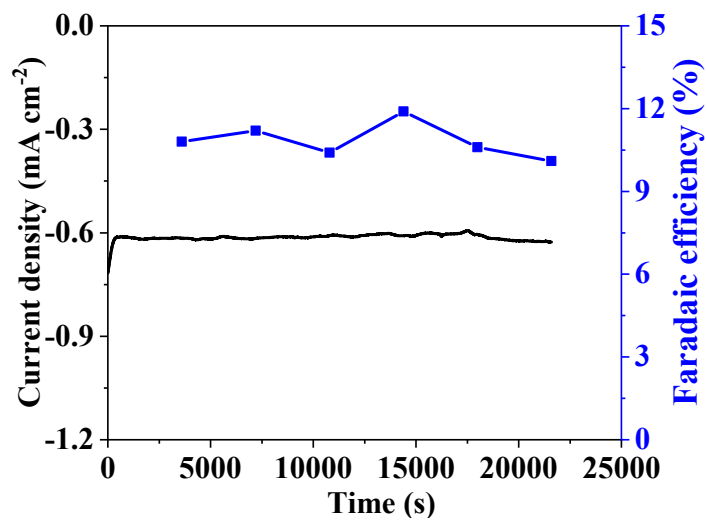

**Fig. S10** Chronoamperometric curve and  $NH_3$  production efficiency during electrochemical reduction of  $N_2$  on CSA/NPC-750 at -0.2 V.

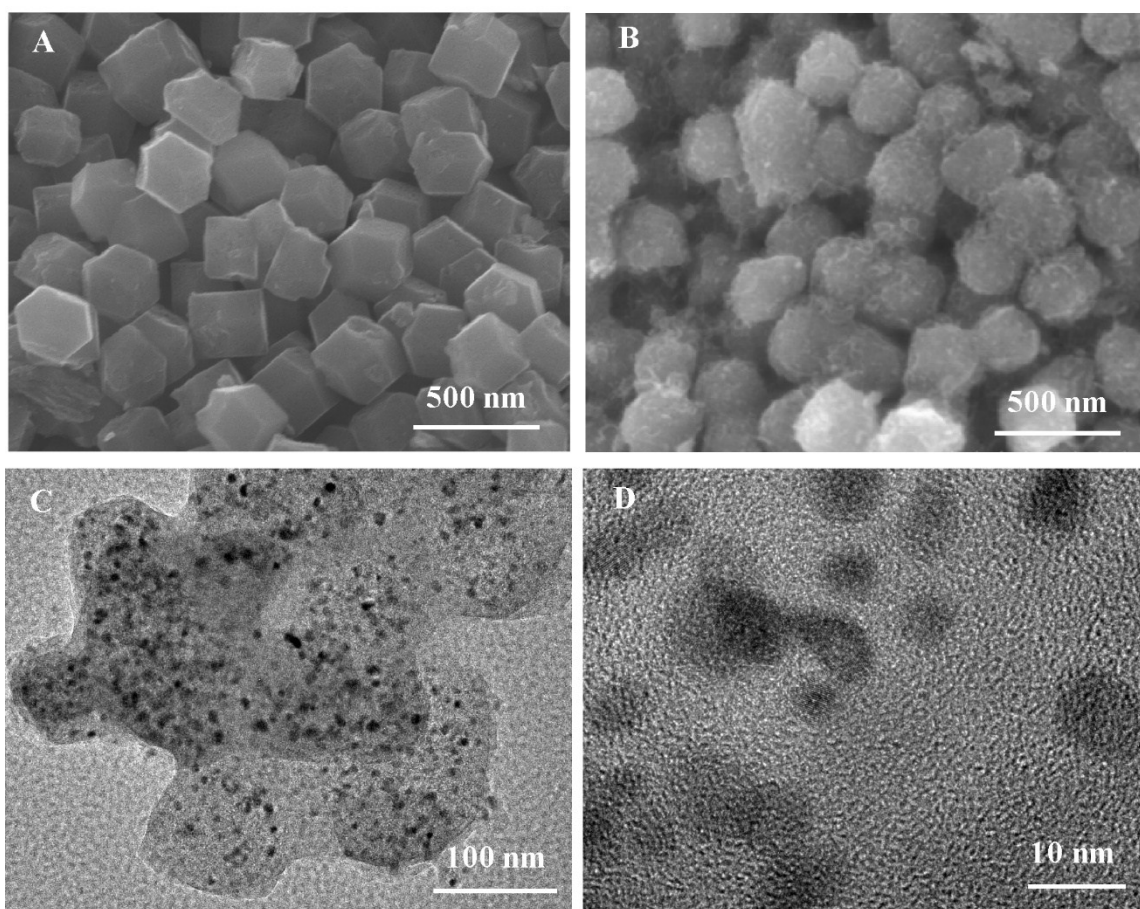

**Fig. S11** SEM images of (A) NPC-750 and (B) Co/NPC-750, (C) low and (D) high resolution TEM images of Co/NPC-750.



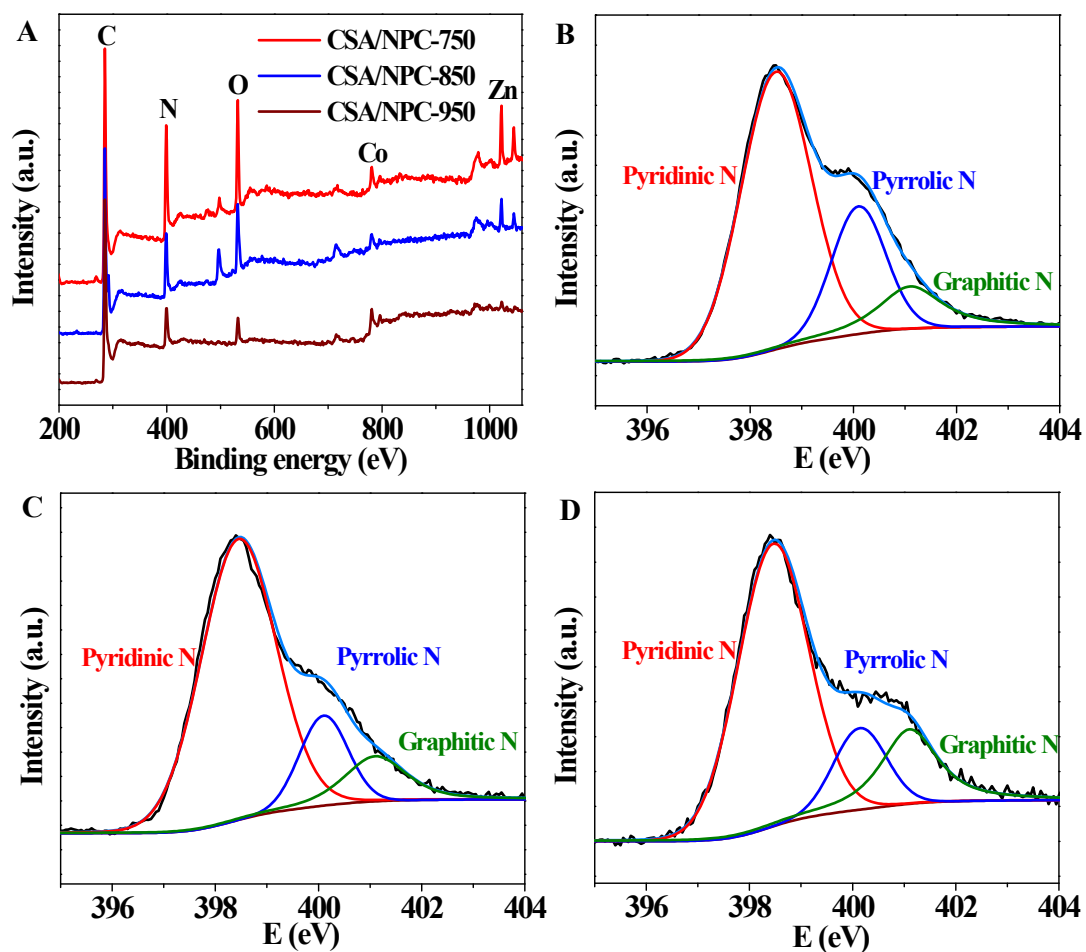

**Fig. S12** (A) XPS survey scan spectra of CSA/NPCs, N 1s XPS spectra of (B) CSA/NPC-750, (C) CSA/NPC-850 and (D) CSA/NPC-950.

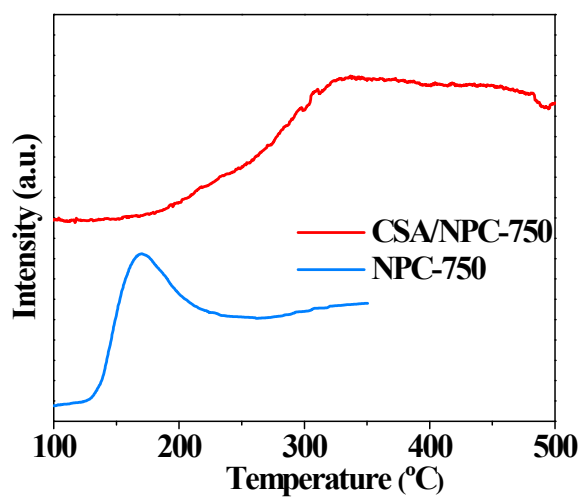

**Fig. S13** N<sub>2</sub>-TPD curves of CSA/NPC-750 and NPC-750.

DFT calculation was conducted on Vienna Ab-initio Simulation Package (VASP) with the projector augmented wave (PAW) potentials, the generalized gradient approximation (GGA) parameterized by Perdew, Burke and Ernzerhof (PBE) for exchange correlation functional.<sup>2,3</sup> The Co single atoms embedded N-doped carbon (CSA/NPC) with a 7×7 unit cell was used as model (Fig. S14). Both Co atoms coordinated with four N atoms (Co-N4) and pyridinic N were considered in this model. The kinetic energy cutoff was set to 400 eV for the plane-wave basis. To eliminate the interaction of periodic images of the system, vacuum layer above the CSA/NPC plane was selected to be 20 Å. The model structures are optimized by using thresholds for the total energy of 10<sup>-4</sup> eV and force of 0.01 eV/Å. The free energy of possible reaction pathways for NH<sub>3</sub> synthesis was calculated<sup>4-6</sup> as follows:  $\Delta G = \Delta E_{\text{DFT}} + \Delta E_{\text{ZPE}} - T\Delta S$ , where  $\Delta E_{\text{DFT}}$  is the DFT total energy,  $\Delta E_{\text{ZPE}}$  is the zero-point energy, and  $T\Delta S$  is the entropy difference between the initial adsorbed state and final state. During the DFT calculation, the H, N<sub>2</sub>H<sub>x</sub> and NH<sub>x</sub> adsorbed on CSA/NPC are optimized by searching all the possible structures and find the lowest energy ones.

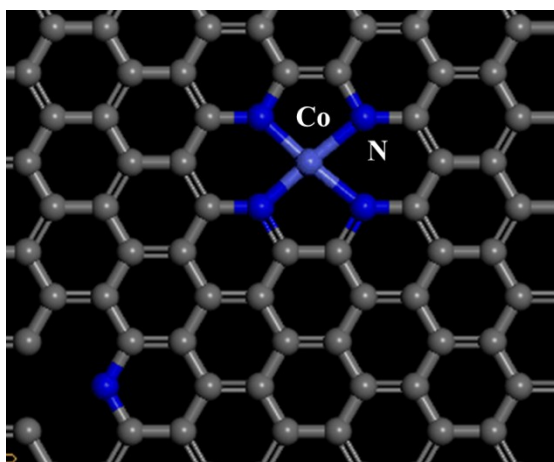

**Fig. S14** The model of CSA/NPC used for DFT calculation.

## 2. Supplementary tables

**Table S1.** The EXAFS fitting results of CSA/NPC-750.

| Electrocatalysts | Bond type | N   | R    | $\sigma^2$ | $\Delta E_0$ (eV) |
|------------------|-----------|-----|------|------------|-------------------|
| CSA/NPC-750      | Co-N      | 4.0 | 1.89 | 0.0034     | -6.7              |

N is the coordination number, R is the distance between absorber and backscatter atoms,  $\sigma^2$  is the Debye-Waller factor value,  $\Delta E_0$  is edge-energy shift

**Table S2.** Comparison of NH<sub>3</sub> synthesis performance between CSA/NPC-750 and electrocatalysts reported recently

| <b>Electrocatalysts</b>                | <b>Production rate<br/>(<math>\mu\text{mol h}^{-1} \text{cm}^{-2}</math>)</b> | <b>Efficiency<br/>(%)</b> | <b>Conditions</b> | <b>References</b>                     |
|----------------------------------------|-------------------------------------------------------------------------------|---------------------------|-------------------|---------------------------------------|
| <b>Au/CeO<sub>x</sub>-RGO</b>          | 0.098                                                                         | 10.1%                     | -0.2 V, pH 2      | Adv. Mater. 2017, 29, 1700001         |
| <b>Au nanorod</b>                      | 0.097                                                                         | 8.11%                     | -0.2 V, pH 13     | Adv. Mater. 2017, 29, 1604799         |
| <b>Fe<sub>2</sub>O<sub>3</sub>/CNT</b> | 0.013                                                                         | 0.18%                     | -1.4 V, pH 7      | Angew. Chem. Int. Ed. 2017, 56, 2699  |
| <b>MoS<sub>2</sub></b>                 | 0.29                                                                          | 1.17%                     | -0.5 V, pH 7      | Adv. Mater. 2018, 30, 1800191         |
| <b>Carbon nitride</b>                  | 0.95                                                                          | 11.59%                    | -0.2 V, pH 1      | Angew. Chem. Int. Ed. 2018, 57, 10246 |
| <b>CSA/NPC</b>                         | 0.86                                                                          | 10.5%                     | -0.2 V, pH 7      | This work                             |

**Table S3.** The N/C and Co/C ratios obtained from XPS for CSA/NPC-750 before and after electrochemical reduction of N<sub>2</sub> at -0.2 V.

|                   | <b>N/C ratio</b> | <b>Co/N ratio</b> |
|-------------------|------------------|-------------------|
| <b>Before use</b> | 0.319            | 0.0152            |
| <b>After use</b>  | 0.335            | 0.0146            |

XPS is used to quantify CSA/NPC-750 before and after electrochemical reduction of N<sub>2</sub> at -0.2 V. As shown in Figure S11 and Table S3, the atom ratios of N/C and Co/C are 0.319 and 0.0152 before use. After electrochemical reduction of N<sub>2</sub> for six cycles (1 h for each cycle), the N/C ratio is 0.335. The slightly increased N content could be caused by measurement error and/or adsorbed ammonia. The Co/C ratio is 0.0146 after use, which can be considered as the same before reaction.

**Table S4.** The metal and N contents of CSA/NPCs, NPC-750 and Co/NPC-750

| <b>Electrocatalysts</b> | <b>Co content</b> | <b>Zn content</b> | <b>N content</b> |
|-------------------------|-------------------|-------------------|------------------|
| <b>CSA/NPC-750</b>      | 1.4 wt%           | 4.3 wt%           | 20.6 at. %       |
| <b>CSA/NPC-850</b>      | 1.5 wt%           | 1.8 wt%           | 15.3 at. %       |
| <b>CSA/NPC-950</b>      | 1.8 wt%           | 0.03 wt%          | 13.0 at. %       |
| <b>NPC-750</b>          | 0                 | 4.2 wt%           | 20.7 at. %       |
| <b>Co/NPC-750</b>       | 8.2 wt%           | 4.1 wt%           | 21.8 at. %       |

Metal content is measured by inductively coupled plasma atomic emission spectroscopy, N content is measured by XPS.

### 3. References

1. F. Zhou, L. M. Azofra, M. Ali, M. Kar, A. N. Simonov, C. McDonnell-Worth, C. Sun, X. Zhang, D. R. MacFarlane, *Energy Environ. Sci.* **2016**, *9*, 2545-2549.
2. J. P. Perdew, K. Burke and M. Ernzerhof, *Phys. Rev. Lett.*, 1996, **77**, 3865-3868.
3. G. Kresse and J. Hafner, *Phys. Rev.*, 1993, **47**, 558-561.
4. Z. Geng, Y. Liu, X. Kong, P. Li, K. Li, Z. Liu, J. Du, M. Shu, R. Si and J. Zeng, *Adv. Mater.*, 2018, **30**, 1803498.
5. S. Back and Y. Jung, *Phys. Chem. Chem. Phys.*, 2016, **18**, 9161-9166.
6. X. Yu, P. Han, Z. Wei, L. Huang, Z. Gu, S. Peng, J. Ma and G. Zheng, *Joule*, 2018, **2**, 1610-1622.
